# Supplementary material
Source: ML conference proceedings conference paper supplement (https://openreview.net/forum?id=6j9YOwh8itH)
Supplement: supplementary_material [file attachment]

---

## A UNROLLING CLASSIFIER

In the following, we use  $\text{FC}(v)$  to denote a linear (fully-connected) transformation on vector  $v$ . The parameters of different FC's are distinguished by their subscripts.

We took global average pooling followed by a flatten operator on spatial dimension to obtain a 1D vector of  $y_t$  (see eq. 17) as  $\overline{y}_t$ . The unrolling LSTM is then performed on the  $\overline{y}_t$  to unfold the predictions. The hidden and memory states of the unrolling LSTM are initialized by the  $\overline{y}_t$  with additional transformations:

$$\xi = \text{ReLU}(\text{FC}_\xi(\overline{y}_t)) \quad (\text{A.1})$$

$$feat = \text{ReLU}(\text{FC}_{feat}(\xi)) \quad (\text{A.2})$$

$$c_0^{url} = \text{FC}_c(feat) \quad (\text{A.3})$$

$$h_0^{url} = \text{FC}_h(feat) \quad (\text{A.4})$$

the states are unrolled  $T$  steps, where  $T = \tau_a$  (anticipate time)  $\times$  fps, with the consistent input  $\overline{y}_t$ ,

$$(h_T^{url}, c_T^{url}) = \text{LSTMCell}(\overline{y}_t, (h_{T-1}^{url}, c_{T-1}^{url})) \quad (\text{A.5})$$

We leverage the final unrolling output  $h_T^{url}$  for further logits calculation:

$$\text{logit}_a = \text{FC}_a(h_T^{url}) \quad (\text{A.6})$$

$$\text{logit}_v = \text{FC}_v(h_T^{url}) + \text{FC}_{a2v}(\text{logit}_a) \quad (\text{A.7})$$

$$\text{logit}_n = \text{FC}_n(h_T^{url}) + \text{FC}_{a2n}(\text{logit}_a) \quad (\text{A.8})$$

where the  $\text{logit}_a$  also serves as biases to  $\text{logit}_v$  and  $\text{logit}_n$  for explicitly building the relationship of action to the verb and noun.

The cross-entropy loss is used to compare between logits and ground-truth labels. The overall loss function is the summation over the individual loss of each action, verb, and noun, for every anticipation time.
